# Supplementary material for: Artificial Intelligence Can Cut Costs While Maintaining Accuracy in Colorectal Cancer Genotyping
Source: PubMed Central journal article supplement (PMC8217761; doi:10.3389/fonc.2021.630953), 2021-06-08
Supplement: DataSheet_1.pdf [file DataSheet_1.pdf]

**eFigure 1: Artificial intelligence receiver-operator curve and choice of cutoffs**
